# Supplementary material for: Validation of nomogram-revised risk index and comparison with other models for extranodal nasal-type NK/T-cell lymphoma in the modern chemotherapy era: indication for prognostication and clinical decision-making
Source: PubMed Central journal article supplement (PMC7787971; doi:10.1038/s41375-020-0791-3), 2020-03-09

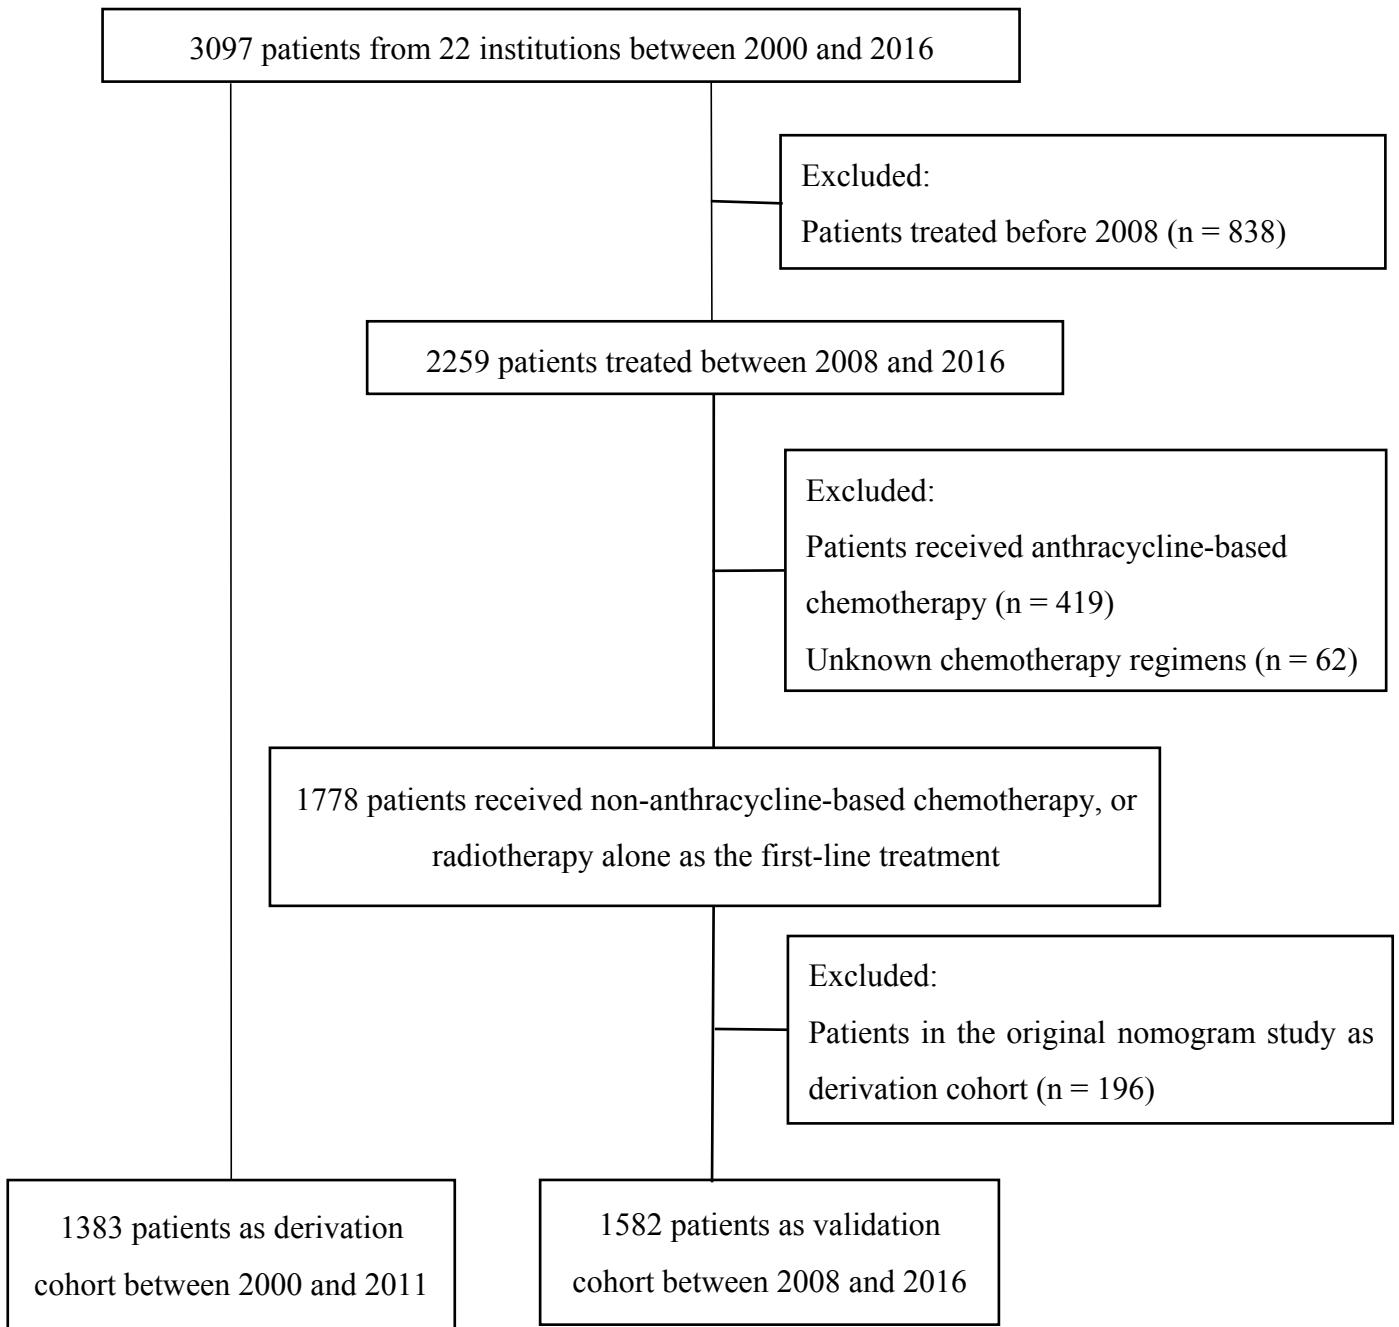

Supplement: 41375_2020_791_MOESM6_ESM.pdf [file 41375_2020_791_MOESM6_ESM.pdf]
